# Supplementary material for: Molecular and network disruptions in neurodevelopment uncovered by single cell transcriptomics analysis of CHD8 heterozygous cerebral organoids
Source: PubMed Central journal article supplement — Heliyon. 2024 Jul 18;10(14):e34862. doi: 10.1016/j.heliyon.2024.e34862 (PMC11325375; doi:10.1016/j.heliyon.2024.e34862), 2024-07-18

**Molecular and network disruptions in neurodevelopment uncovered by single cell transcriptomics analysis of CHD8 heterozygous cerebral organoids**

Maidor Astorkia <sup>1,#</sup>, Yang Liu <sup>1,#</sup>, Erika M Pedrosa <sup>2</sup>, Herbert M. Lachman <sup>1,2,3\*</sup>, Deyou Zheng <sup>1,3,4\*</sup>

1. Department of Genetics, Albert Einstein College of Medicine, Bronx, NY, USA

2. Department of Psychiatry and Behavioral Science, Albert Einstein College of Medicine, Bronx, NY, USA

3. Department of Neuroscience, Albert Einstein College of Medicine, Bronx, NY, USA

4. Department of Neurology, Albert Einstein College of Medicine, Bronx, NY, USA

**Supplemental Figures**

**Figure S1. Heatmaps for the expression pattern of selected marker genes used in previous publication publications, and a bubble plot for key genes used in our cluster annotation.**

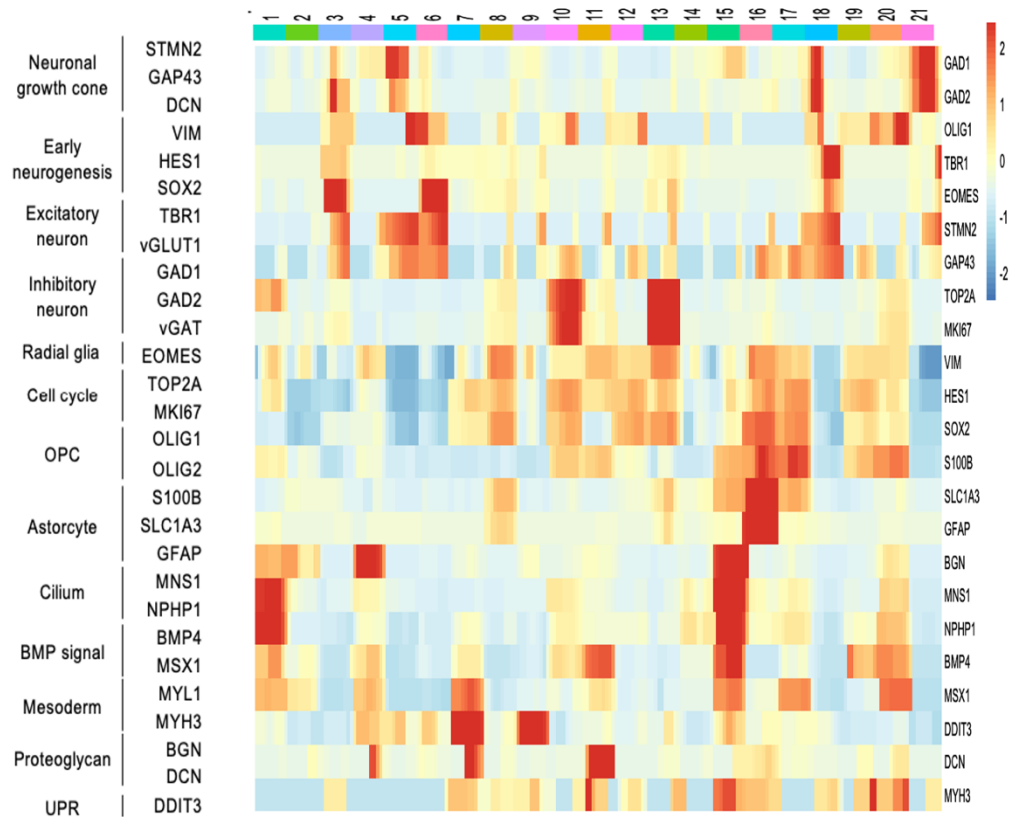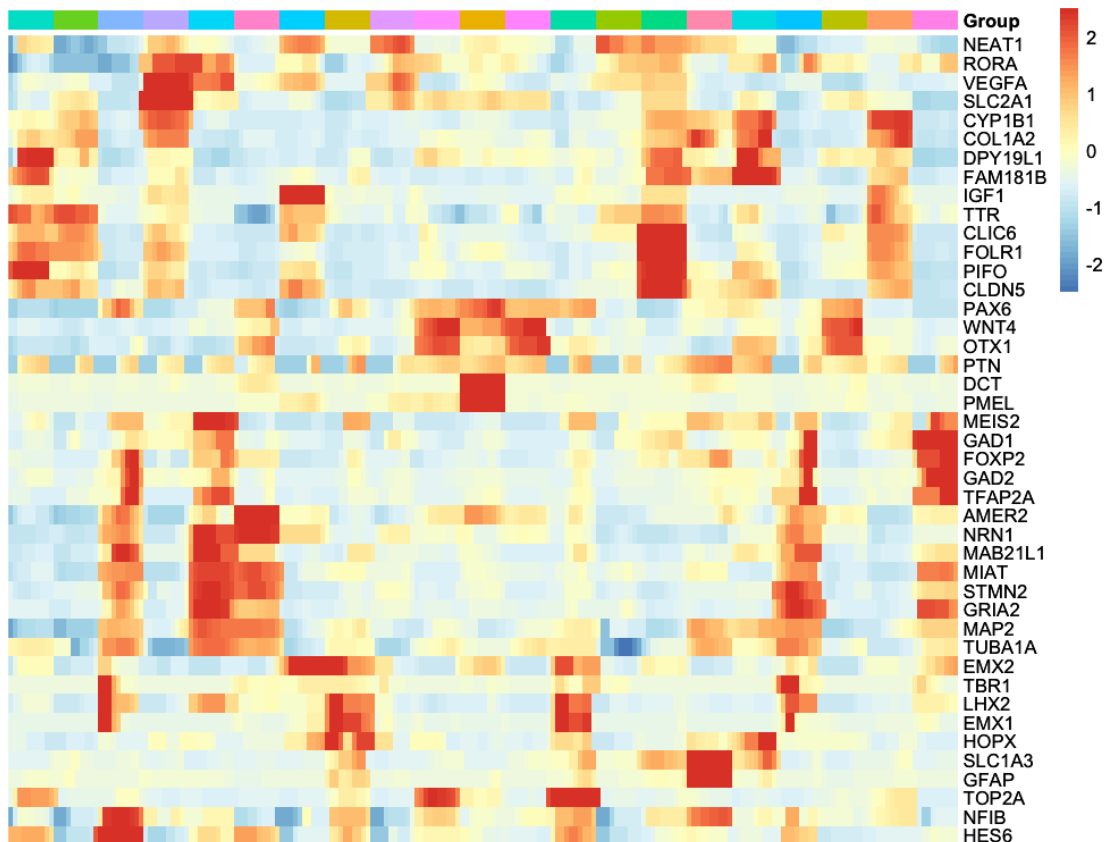

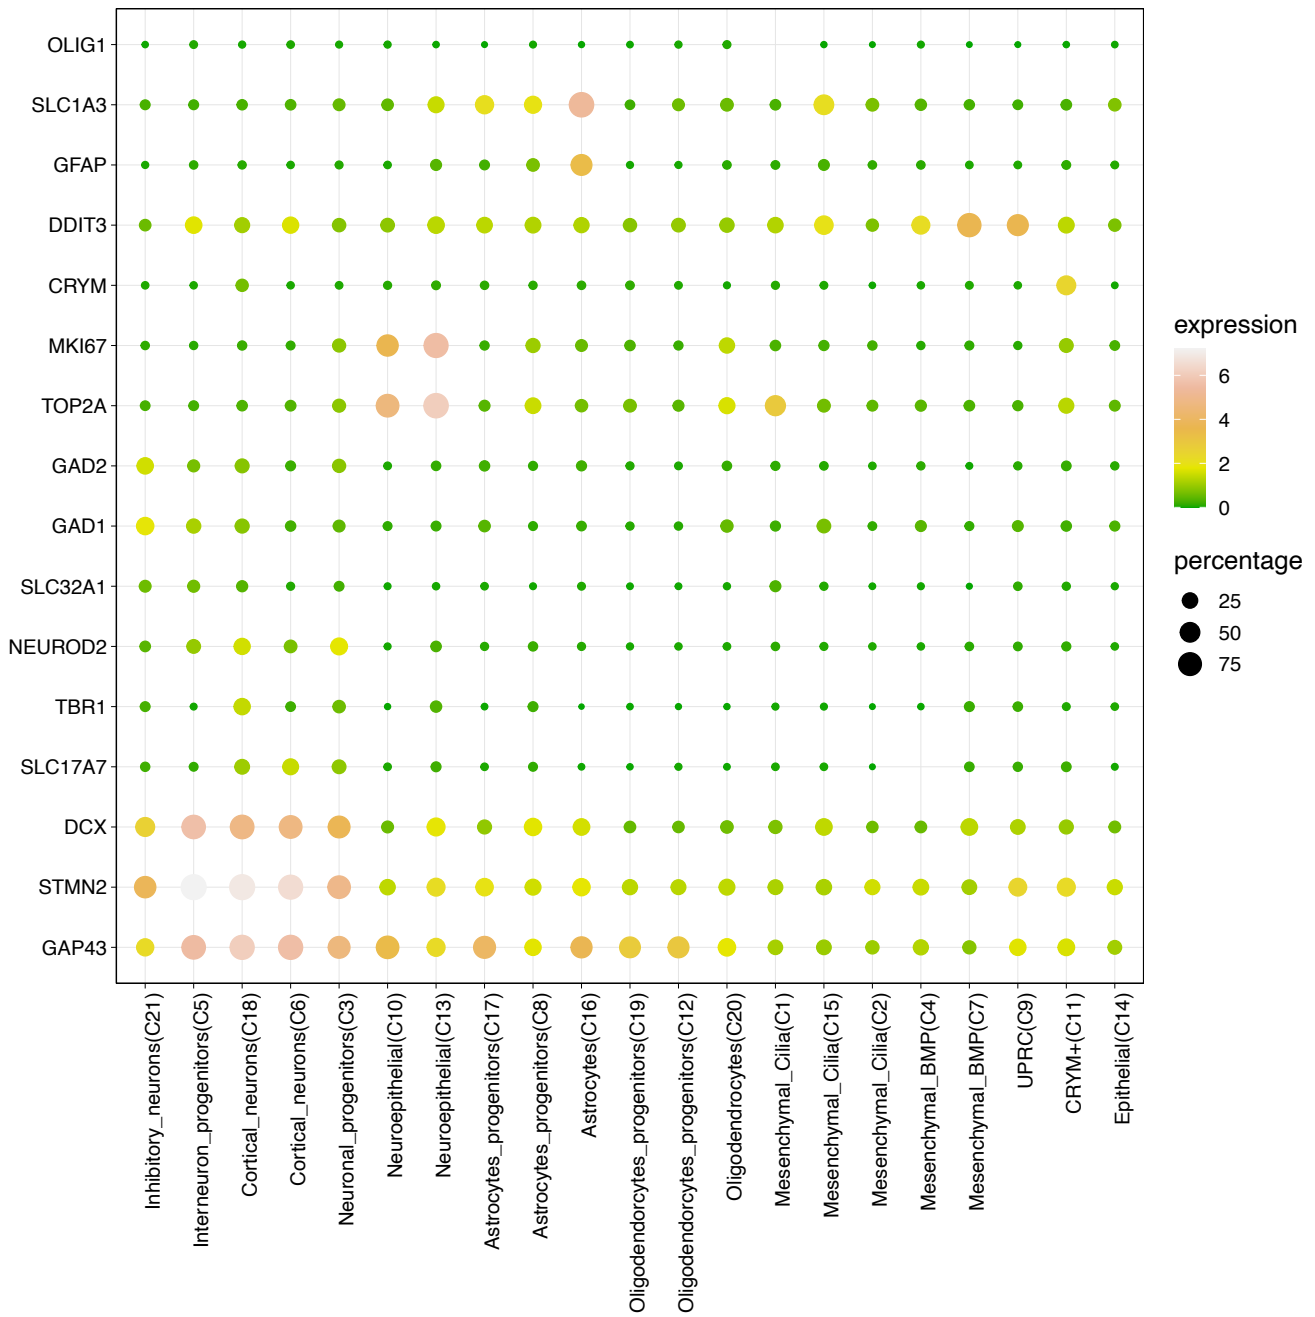

**Figure S2. Dendrogram for cluster similarity based on mean gene expression averaged for all cells in each cluster.**

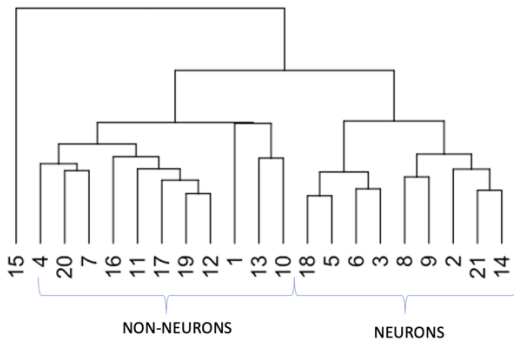

**Figure S3. Proportion of spliced/unspliced reads for each cell cluster.**

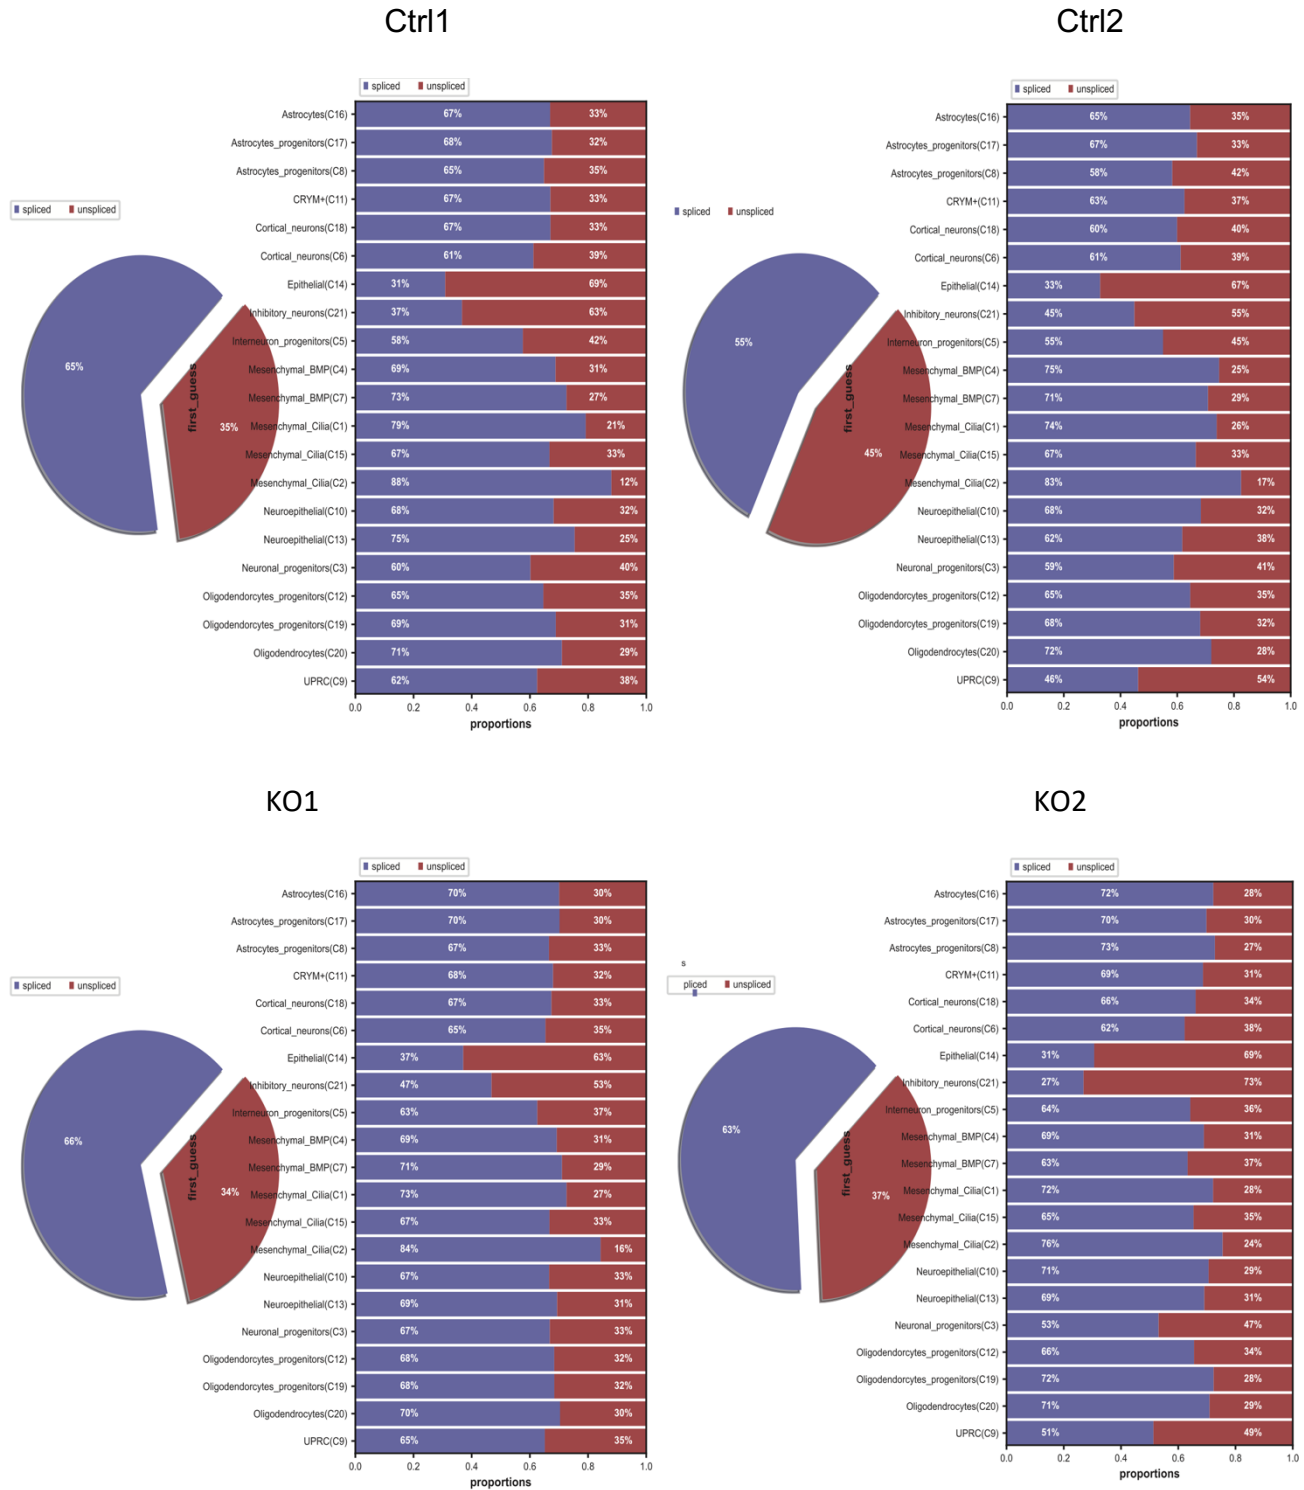

**Supplementary Figure S4: Dot plot showing enriched pathways from GSEA for neuronal (A) and non-neuronal (B) cell clusters. Red and blue indicate higher and lower activities (GSEA NES) in the *CHD8* KO samples compared to controls, respectively. Dot sizes indicate statistical significance defined as 1/FDR.**

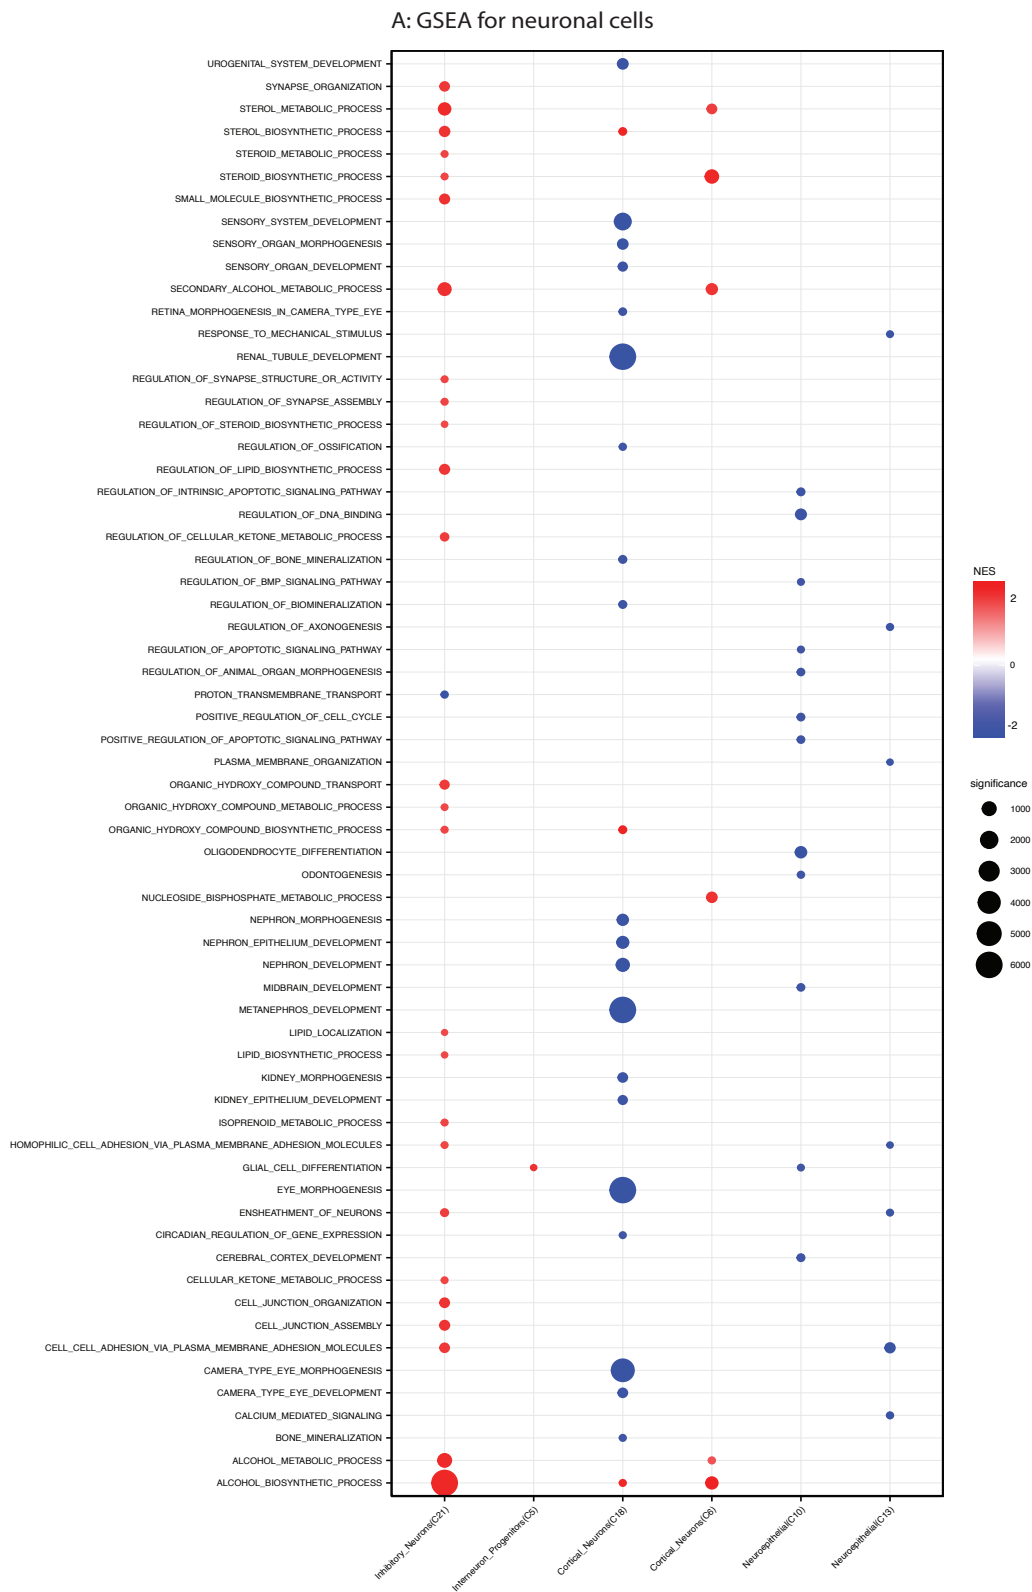

B: GSEA for non-neuronal cells

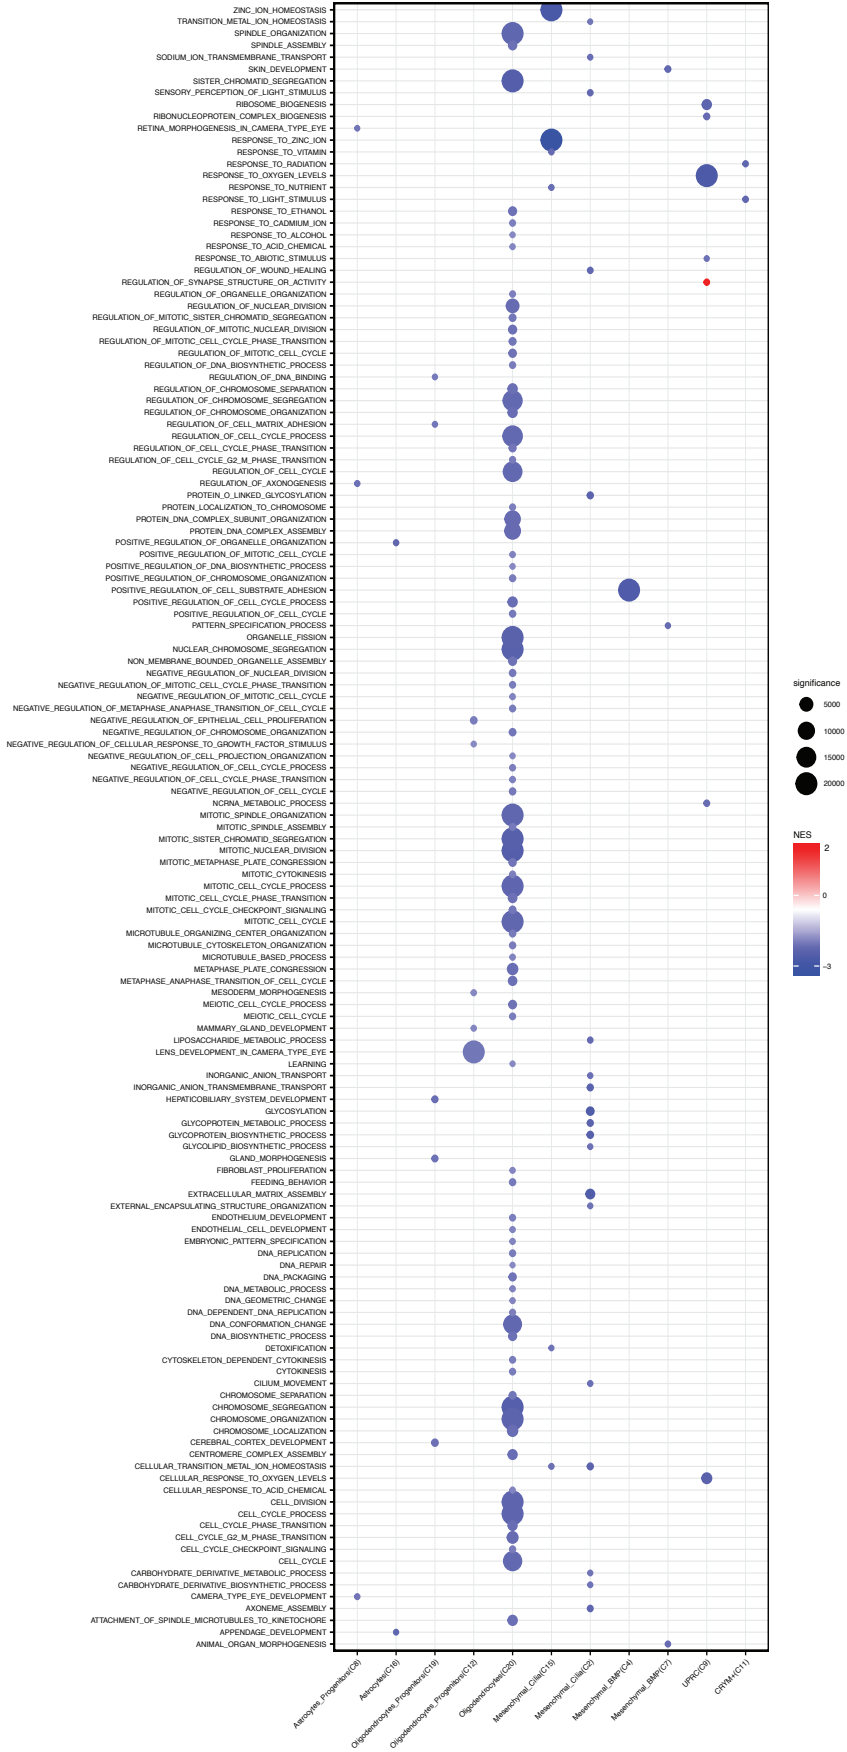

**Figure S5: Violin plots showing differential expression of genes implicated in ASD**

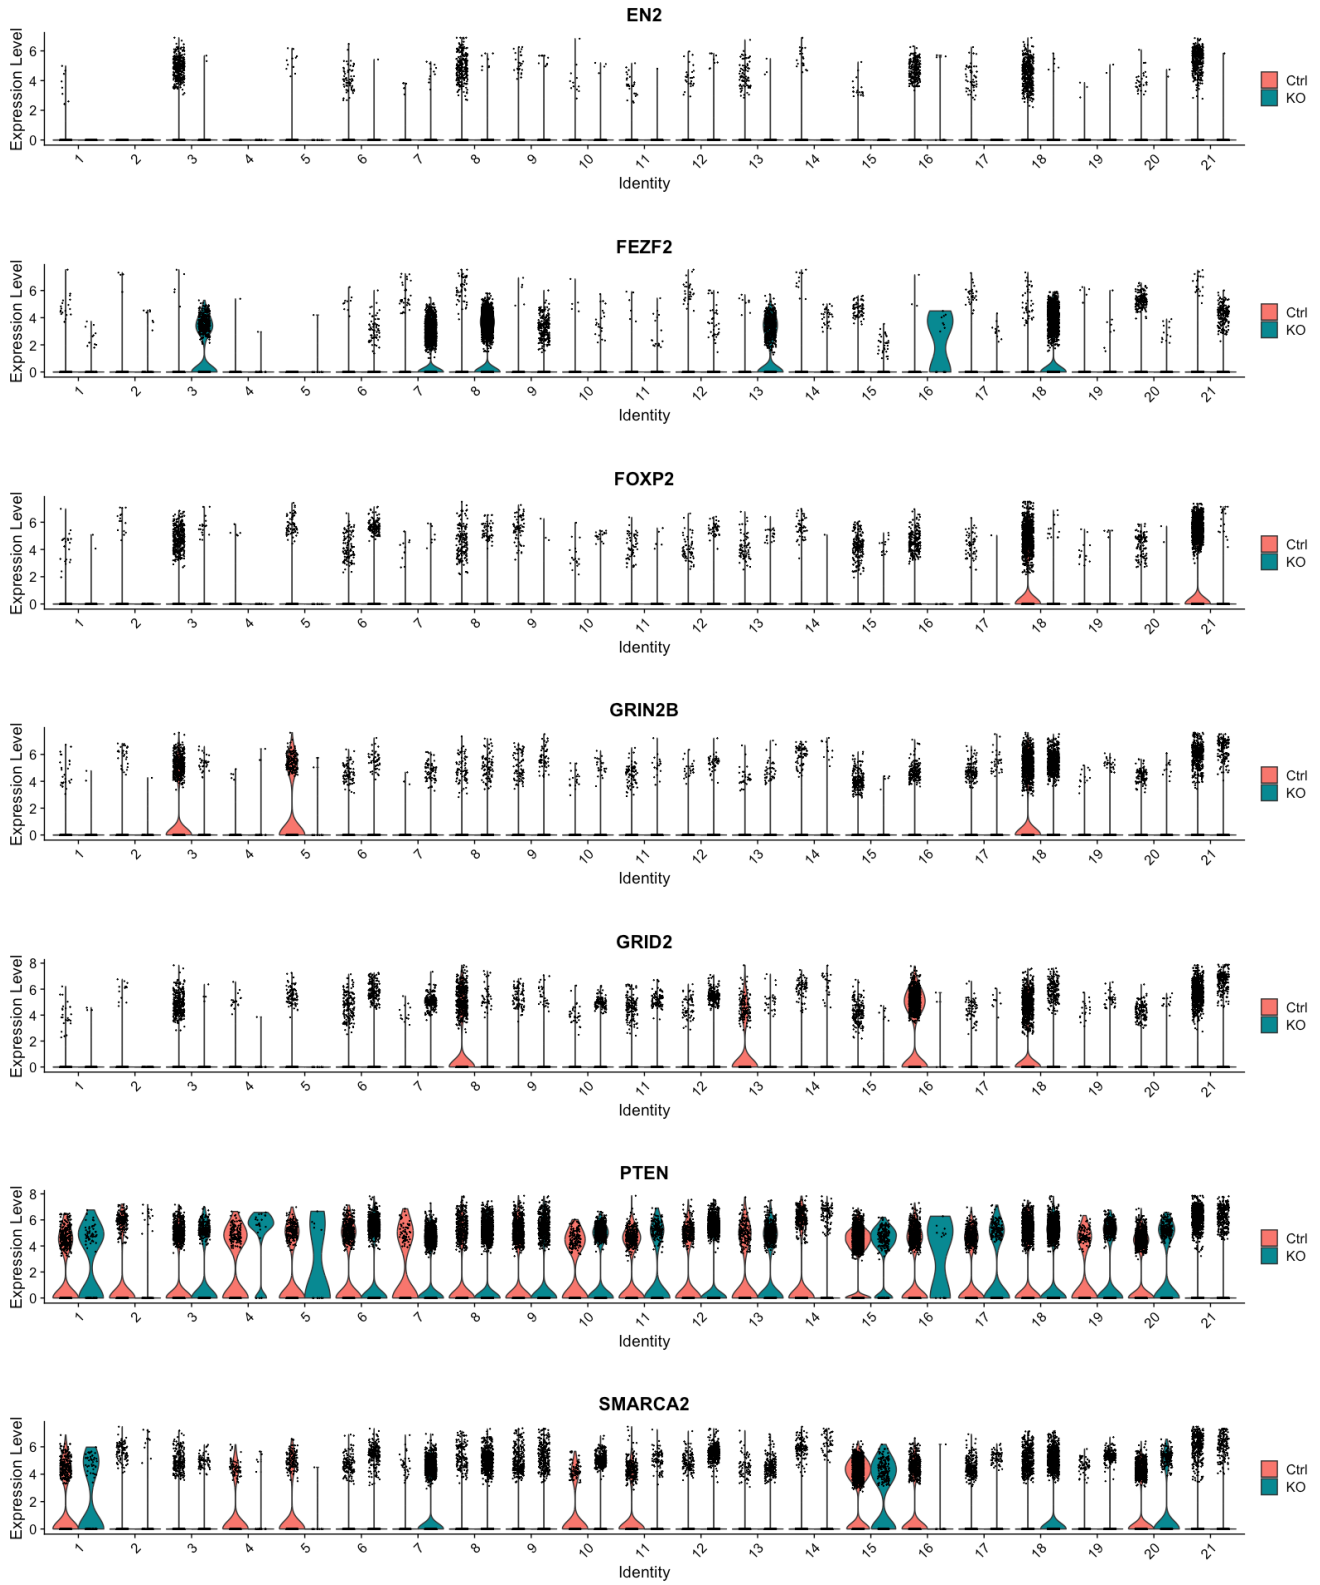

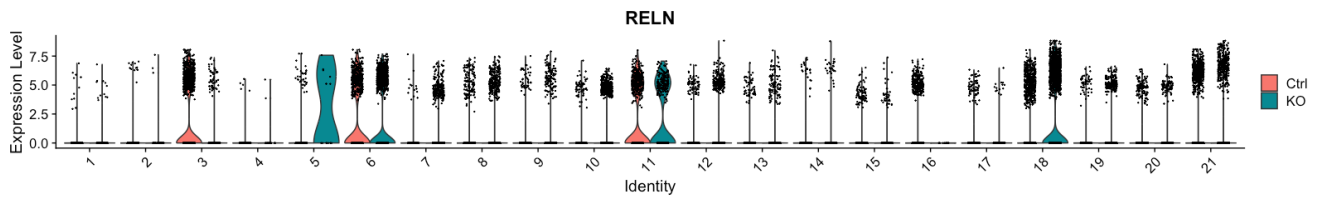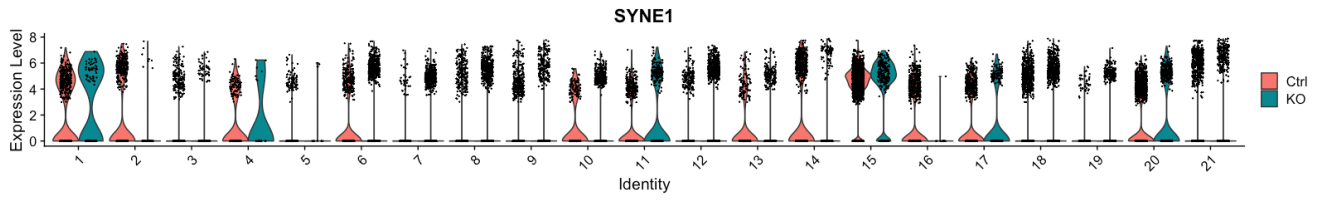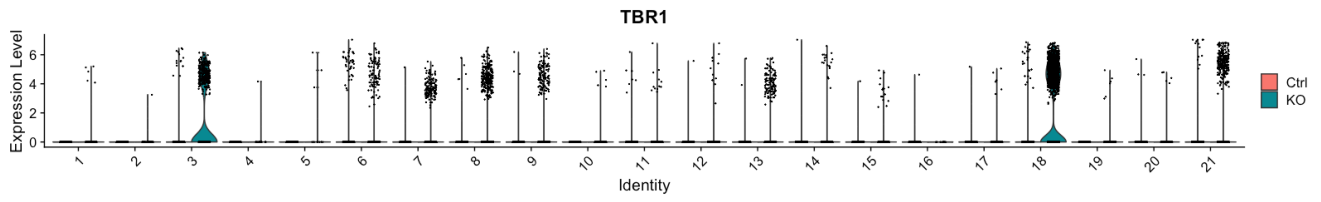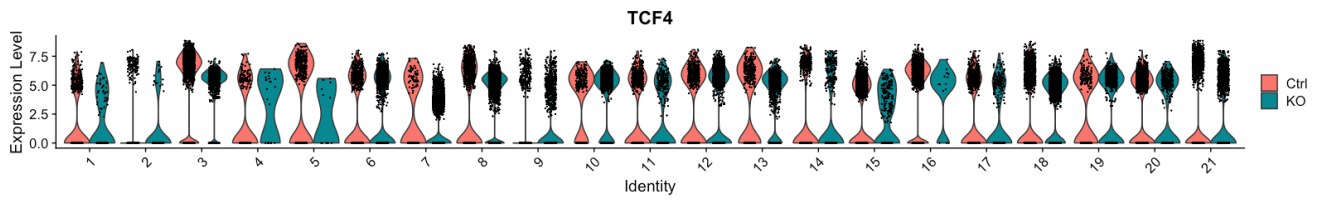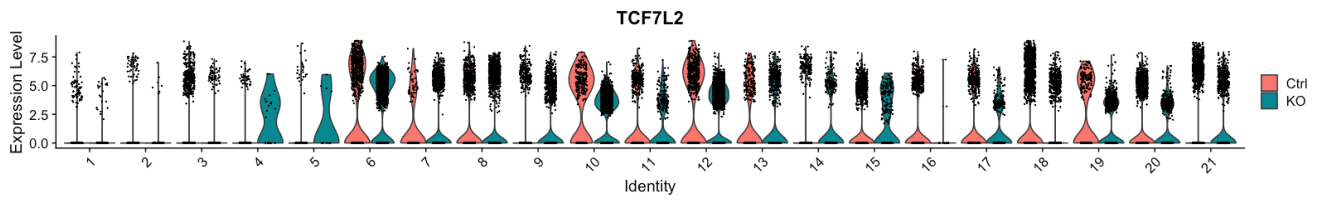



**Figure S6. Heatmap showing cell-cell communication count differences between control and CHD8 KO samples.** The rows and columns indicate signaling sending and receiving cells, respectively.

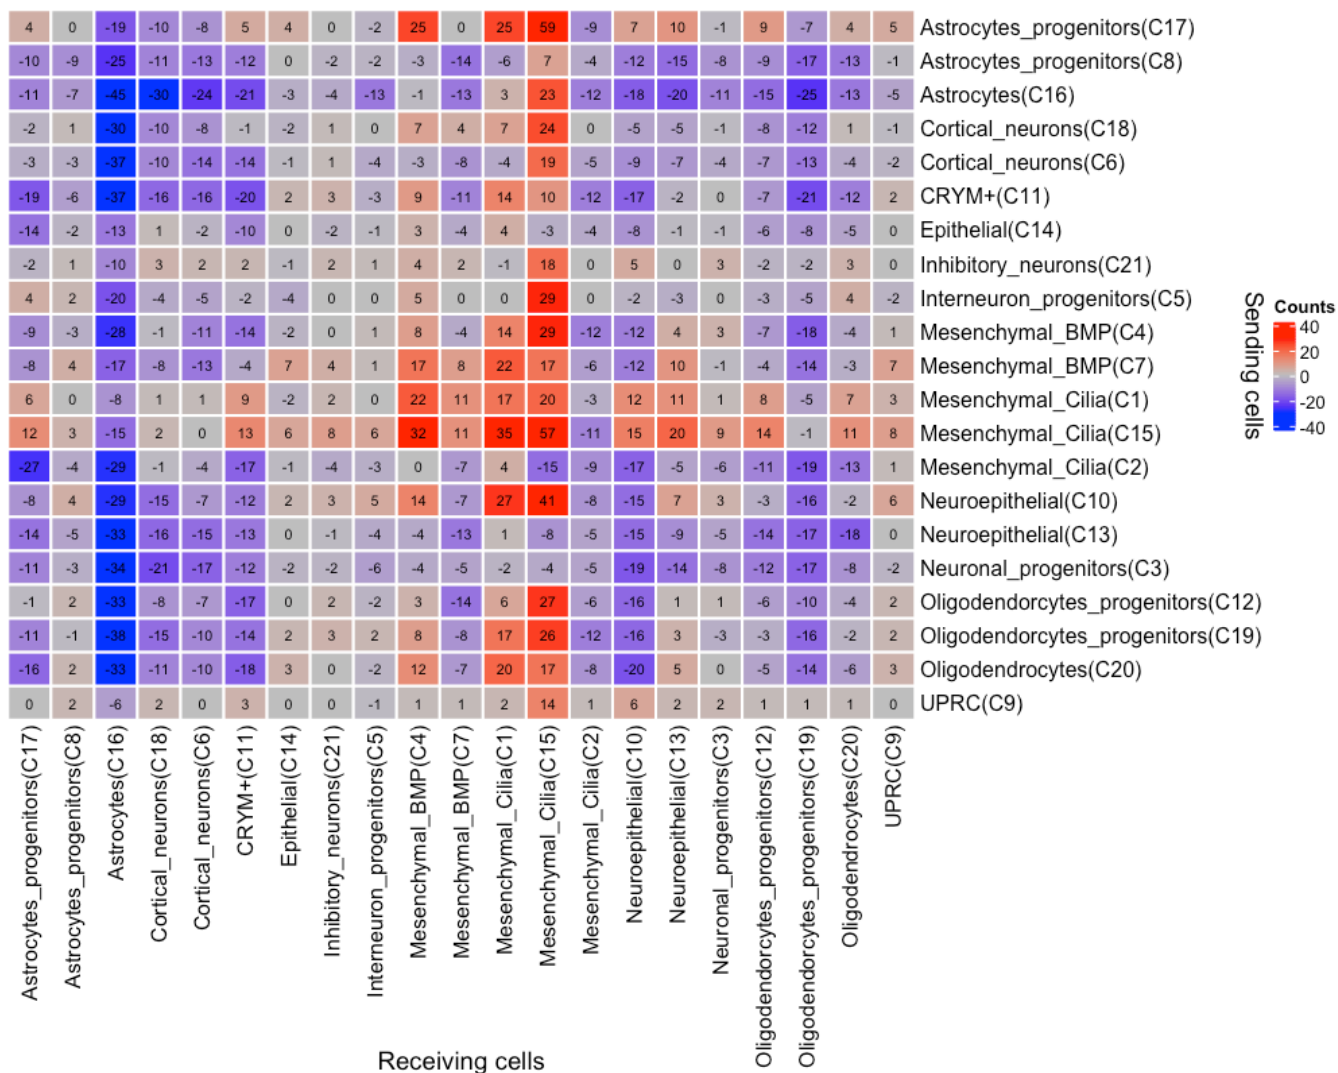

**Figure S7. Heatmap showing cell-cell communication strength differences between control and CHD8 KO samples.** The rows and columns indicate signaling sending and receiving cells, respectively.

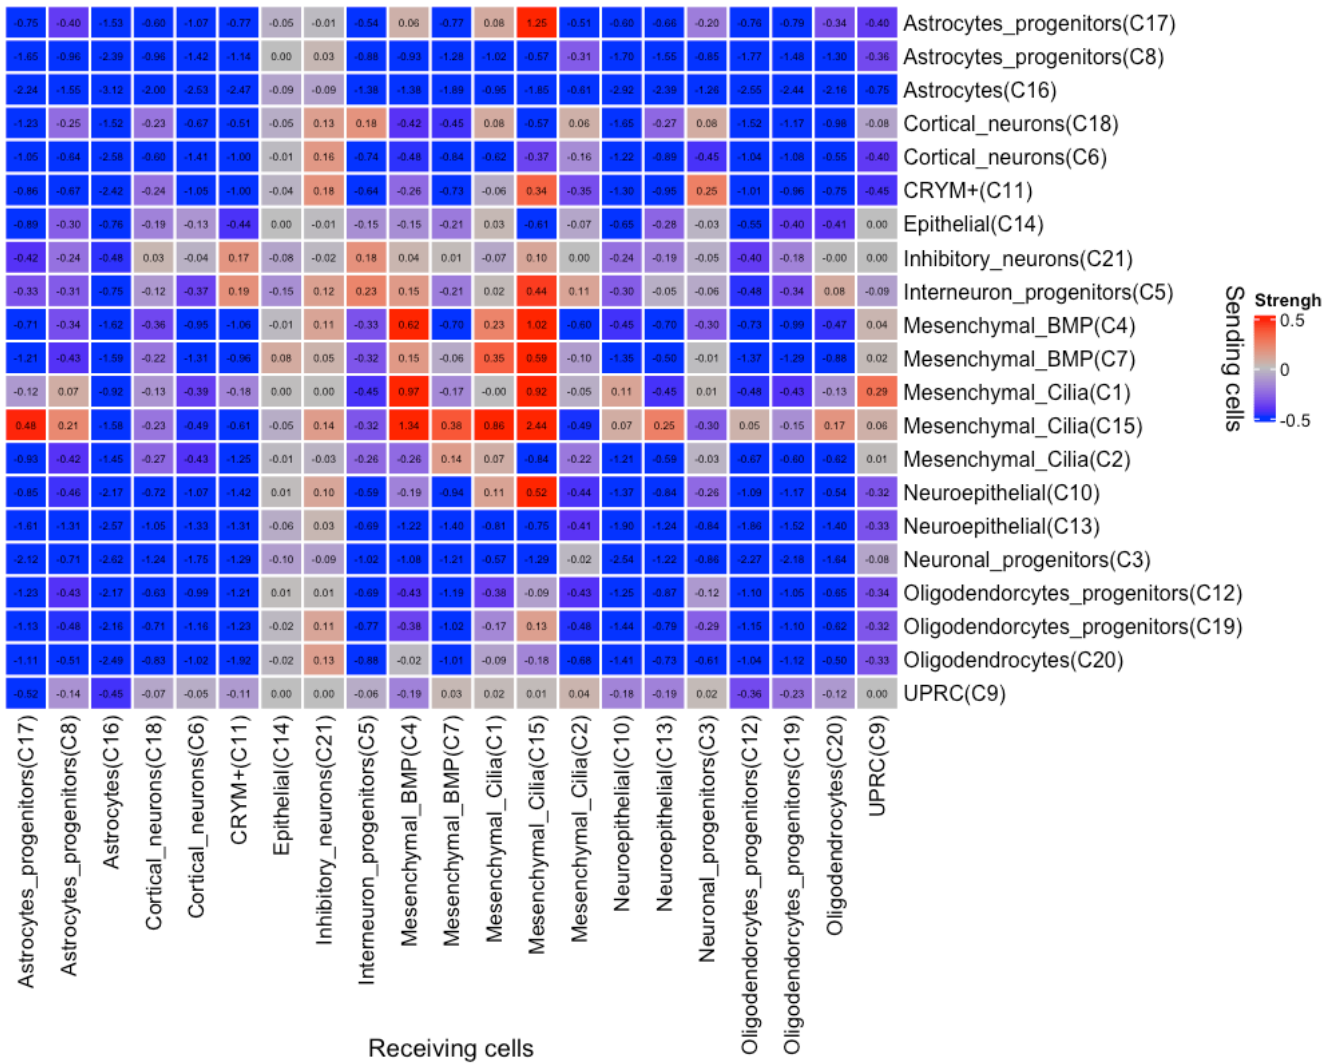

**Figure S8. Violin plots showing differential expression of genes encoding ligands or receptors**

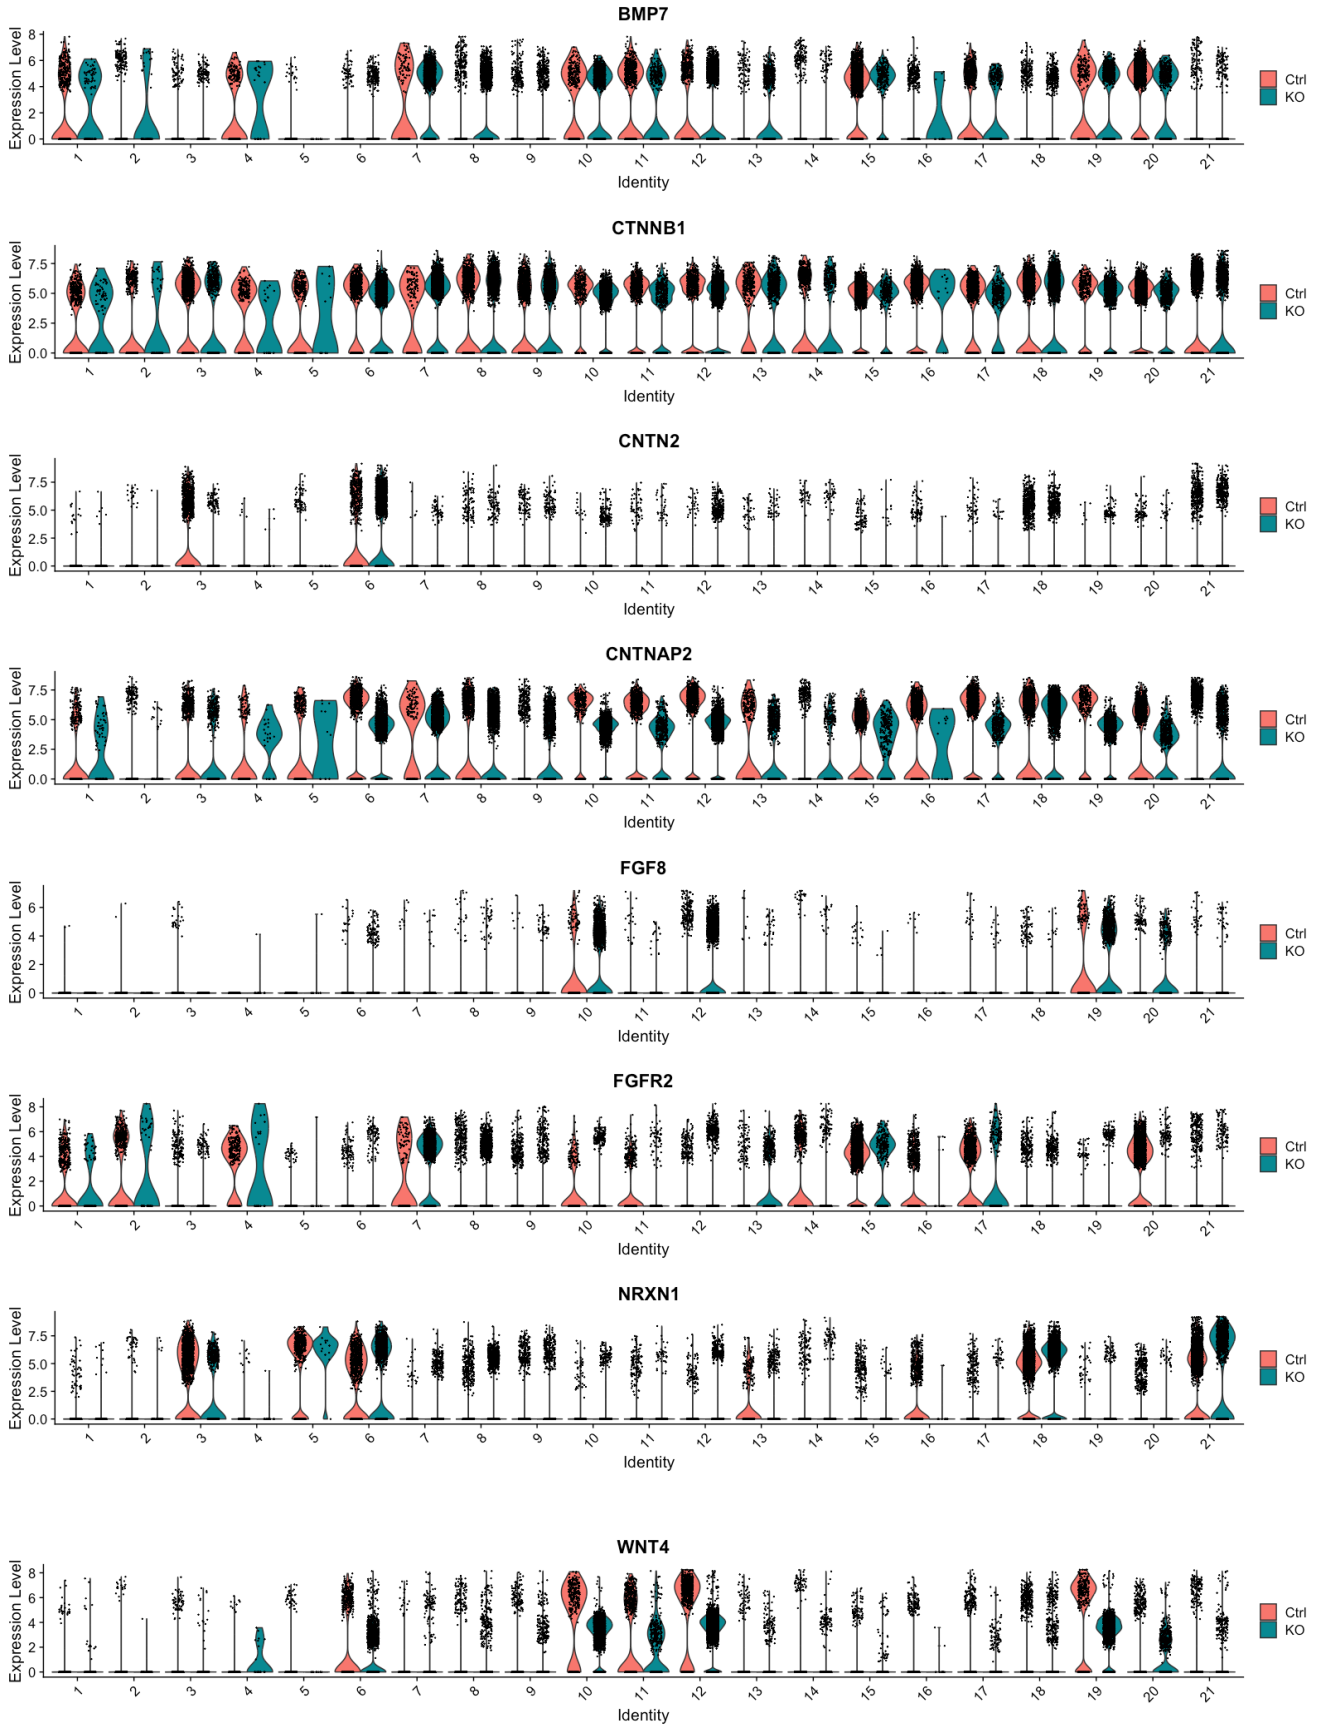

Supplement: mmc1.pdf [file mmc1.pdf]
